# Supplementary material for: Characterization of a G-Quadruplex Structure in Pre-miRNA-1229 and in Its Alzheimer’s Disease-Associated Variant rs2291418: Implications for miRNA-1229 Maturation
Source: PubMed Central journal article supplement (PMC7037302; doi:10.3390/ijms21030767), 2020-01-24

**Supplemental Figure S1.** Biophysical characterization of pre-miRNA-1229\_WT GQ. UV thermal denaturation profiles (A) of pre-miRNA-1229\_GQ WT reveal a hypochromic transition, corresponding to GQ dissociation, between 65°C and 95°C. The average  $T_m$  was determined to be ~80°C. Full 20% non-denaturing gels (B) are shown, visualized with UV shadow (left panel) and stained in NMM (right panel).

**Supplemental Figure S2.** Biophysical characterization of pre-miRNA-1229\_WT FL. Full 15% nondenaturing gels of pre-miRNA-1229\_WT FL are shown, visualized with UV shadow (left panel) and stained in NMM (right panel).

**Supplemental Figure S3.** Biophysical characterization of pre-miRNA-1229\_SNP GQ. UV thermal denaturation profiles (A) of pre-miRNA-1229\_GQ SNP reveal a hypochromic transition, corresponding to GQ dissociation, between 65°C and 95°C. The average  $T_m$  was determined to be ~79°C. Full 20% non-denaturing gels (B) are shown, visualized with UV shadow (left panel) and stained in NMM (right panel).

**Supplemental Figure S4.** Biophysical characterization of pre-miRNA-1229\_SNP FL. Full 15% non-denaturing gels of pre-miRNA-1229\_SNP FL are shown, visualized with UV shadow (left panel) and stained in NMM (right panel).

# Supplemental Figure S1

**A**

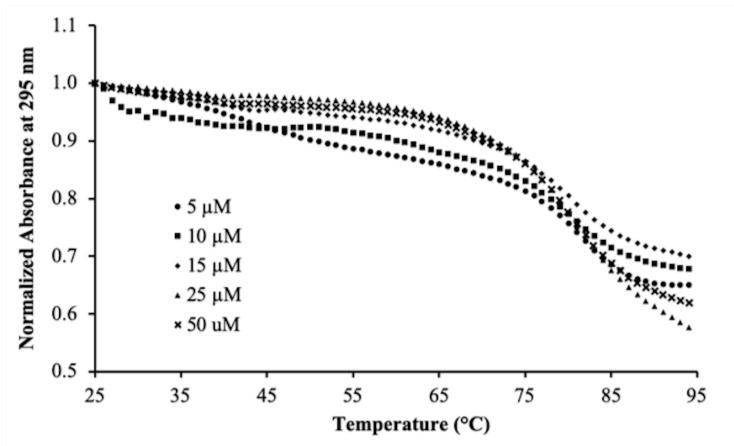

**B**

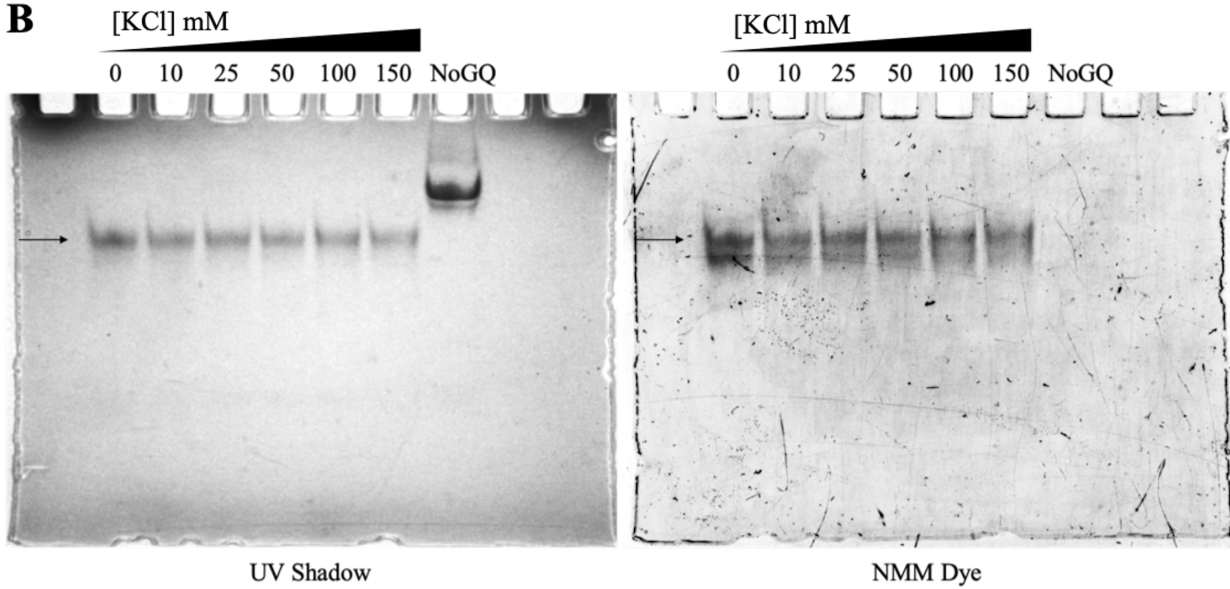

# Supplemental Figure S2

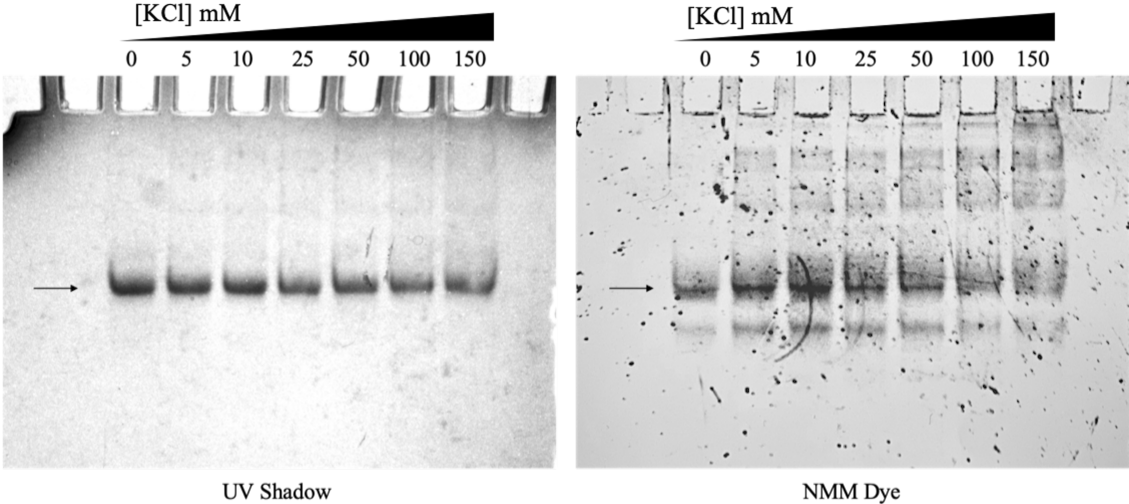

# Supplemental Figure S3

**A**

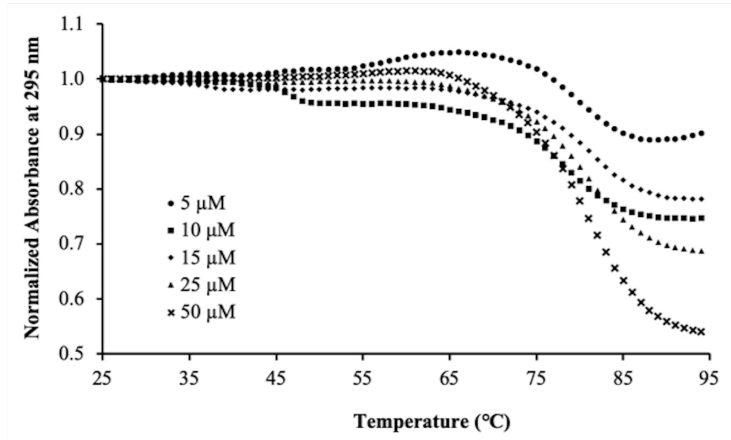

**B**

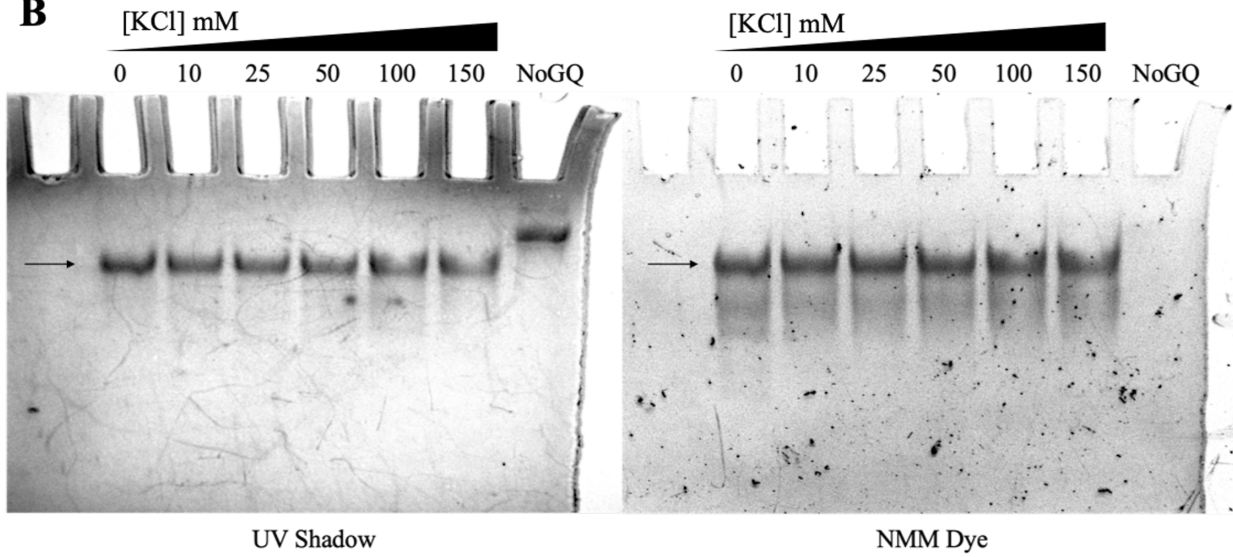

# Supplemental Figure S4

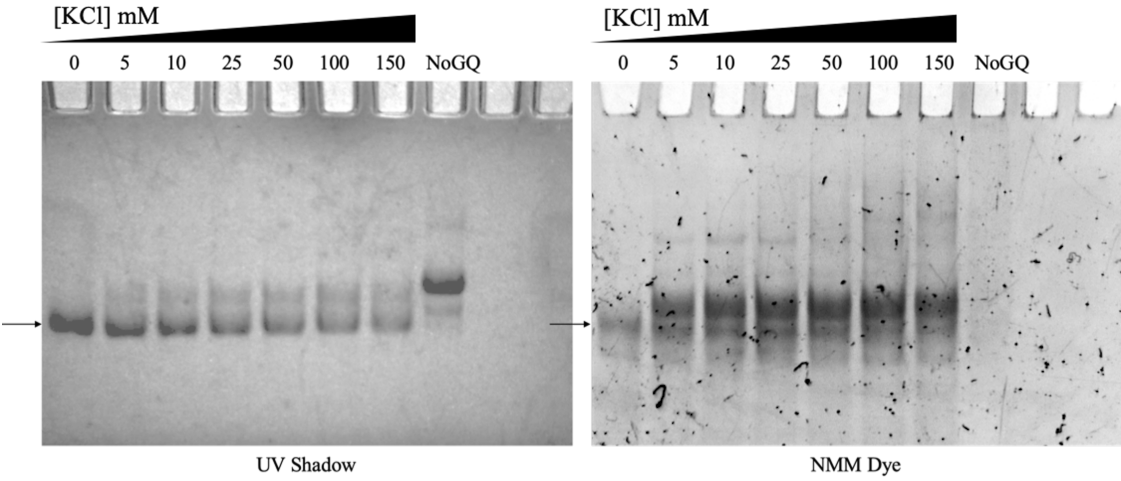

Supplement: ijms-21-00767-s001.pdf [file ijms-21-00767-s001.pdf]
